# Supplementary material
Source: MDPI journal article supplement (https://www.mdpi.com/2624-8611/5/3/40)
Supplement: s1 [file s1]

**Table S2.** Study characteristics of the 34 articles investigating postsecondary campus mental health risk and protective factors.

| <b>Characteristic</b>                                                   | <b>N</b> | <b>%</b> |
|-------------------------------------------------------------------------|----------|----------|
| <b>Document type</b>                                                    |          |          |
| Journal article                                                         | 31       | 91.2     |
| Thesis                                                                  | 3        | 8.8      |
| <b>Study location<sup>a</sup></b>                                       |          |          |
| National                                                                | 6        | 17.6     |
| Québec                                                                  | 8        | 23.5     |
| Ontario                                                                 | 6        | 17.6     |
| Alberta                                                                 | 5        | 14.7     |
| Nova Scotia                                                             | 4        | 11.8     |
| Manitoba                                                                | 2        | 5.9      |
| Prince Edward Island                                                    | 2        | 5.9      |
| Saskatchewan                                                            | 2        | 5.9      |
| New Brunswick                                                           | 1        | 2.9      |
| Newfoundland and Labrador                                               | 1        | 2.9      |
| <b>Study language</b>                                                   |          |          |
| English                                                                 | 34       | 100.0    |
| <b>Study design</b>                                                     |          |          |
| Cross-sectional                                                         | 27       | 79.4     |
| Longitudinal                                                            | 5        | 14.7     |
| Mixed methods                                                           | 2        | 5.9      |
| <b>Study informed through framework, theory, or model</b>               |          |          |
| Yes                                                                     | 13       | 38.2     |
| No                                                                      | 21       | 61.8     |
| <b>Instrument development methods reported</b>                          |          |          |
| Yes                                                                     | 24       | 70.6     |
| No                                                                      | 10       | 29.4     |
| <b>Data collection instruments were pre-tested</b>                      |          |          |
| Yes                                                                     | 5        | 14.7     |
| No                                                                      | 29       | 85.3     |
| <b>Mode of conduct<sup>a</sup></b>                                      |          |          |
| Web-based                                                               | 26       | 76.5     |
| In-person                                                               | 4        | 11.8     |
| Telephone                                                               | 1        | 2.9      |
| Not specified                                                           | 5        | 14.7     |
| <b>Participant recruit methods reported</b>                             |          |          |
| Yes                                                                     | 22       | 64.7     |
| No                                                                      | 12       | 35.3     |
| <b>Response rate reported</b>                                           |          |          |
| Yes                                                                     | 17       | 50.0     |
| No                                                                      | 17       | 50.0     |
| <b>Did the study focus on a specific cohort of students or program?</b> |          |          |
| Undergraduate students                                                  | 16       | 47.1     |
| Students in medical profession <sup>a</sup>                             | 5        | 14.7     |

|                                                                               |    |      |
|-------------------------------------------------------------------------------|----|------|
| No                                                                            | 13 | 38.2 |
| <b>Did the study focus on a priority group of students?</b>                   |    |      |
| Indigenous students                                                           | 2  | 5.9  |
| Reported feeling stressed                                                     | 2  | 5.9  |
| Student athletes                                                              | 2  | 5.9  |
| Immigrants                                                                    | 1  | 2.9  |
| Reported a cognitive, physical, or psychological disability                   | 1  | 2.9  |
| Women                                                                         | 1  | 2.9  |
| No                                                                            | 25 | 73.5 |
| <b>Which socioecological level of influence was investigated?<sup>a</sup></b> |    |      |
| Campus                                                                        | 28 | 82.4 |
| Individual                                                                    | 28 | 82.4 |
| Interpersonal                                                                 | 18 | 52.9 |
| Community/Environment                                                         | 6  | 17.6 |
| Policy                                                                        | 2  | 5.9  |
| <b>Did the study focus on a negative or positive mental health outcome?</b>   |    |      |
| Negative only                                                                 | 25 | 73.5 |
| Positive only                                                                 | 5  | 14.7 |
| Both                                                                          | 4  | 11.8 |

<sup>a</sup> Multiple selections were possible for these questions, and therefore, percentages may exceed 100%.

<sup>b</sup> Students were from a nursing program (n = 1), medical school (n = 3), and dental program (n = 1).
