# Supplementary material
Source: MDPI journal article supplement (https://www.mdpi.com/2624-8611/5/3/40)
Supplement: s1 [file s1]

## APPENDIX: SEARCH DOCUMENTATION

|               |                                                                                                                                                                                                                                                                                                                                                                                                                                                                                                                                                                                                                                                                                                                                                                                                                  |
|---------------|------------------------------------------------------------------------------------------------------------------------------------------------------------------------------------------------------------------------------------------------------------------------------------------------------------------------------------------------------------------------------------------------------------------------------------------------------------------------------------------------------------------------------------------------------------------------------------------------------------------------------------------------------------------------------------------------------------------------------------------------------------------------------------------------------------------|
| Date          | February 06, 2023                                                                                                                                                                                                                                                                                                                                                                                                                                                                                                                                                                                                                                                                                                                                                                                                |
| Database      | Web of Science                                                                                                                                                                                                                                                                                                                                                                                                                                                                                                                                                                                                                                                                                                                                                                                                   |
| Institution   | University of Guelph                                                                                                                                                                                                                                                                                                                                                                                                                                                                                                                                                                                                                                                                                                                                                                                             |
| Search string | (depressi* OR anxiety OR stress OR suicid* OR distress OR hopelessness OR "self-harm" OR "self harm" OR "self injury" OR "self-injurious" OR resilien* OR panic* OR flourish* OR languish* OR hedoni* OR eudaemoni* OR eudemoni* OR thriv* OR dyshtymi* OR “bipolar disorder” OR cyclothymi* OR psychosis OR schizo* OR psychopath* OR “personality disorder” OR “obsessive compulsive disorder” OR OCD OR “eating disorder” OR anorexi* OR bulimi* OR dysmorphi* OR PTSD) OR ((health OR well-being OR “well being” OR wellbeing OR illness* OR disorder* OR problem*) AND (mental OR emotional OR psych*)) AND (student* AND (campus* OR universit* OR colleg* OR “post-secondary” OR "post secondary" OR postsecondary OR “higher education” OR undergrad*))<br><b>In Title, Topic, Abstract, or Keywords</b> |
| Hits          | 2602                                                                                                                                                                                                                                                                                                                                                                                                                                                                                                                                                                                                                                                                                                                                                                                                             |
| Limits        | Countries/Regions: Canada<br>Publication year: 2013-2023<br>Language: English or French                                                                                                                                                                                                                                                                                                                                                                                                                                                                                                                                                                                                                                                                                                                          |

|               |                                                                                                                                                                                                                                                                                                                                                                                                                                                                                                                                                                                                                                                                                                                                                                                                                                                                                                                                                                                                                                                                                                                                                                                                                                                                                                                                                                                                                                                                                                                                                                                                                                                                                                                                                                                                                                                                                                                                                                                                                                                                                                                                                                                                                                                                                                                                                                                                                                                                                                                                                                                                                                                                                                                                                                                                                                                                                                                                                                                                                                                                                                                                                                                                                                                                                                                                                                                                                                                                                                                                                                                                                                                                                                                                                                                                                                                                                                                                                                                                                                                                                                                                                                                                                                                                                                           |
|---------------|-----------------------------------------------------------------------------------------------------------------------------------------------------------------------------------------------------------------------------------------------------------------------------------------------------------------------------------------------------------------------------------------------------------------------------------------------------------------------------------------------------------------------------------------------------------------------------------------------------------------------------------------------------------------------------------------------------------------------------------------------------------------------------------------------------------------------------------------------------------------------------------------------------------------------------------------------------------------------------------------------------------------------------------------------------------------------------------------------------------------------------------------------------------------------------------------------------------------------------------------------------------------------------------------------------------------------------------------------------------------------------------------------------------------------------------------------------------------------------------------------------------------------------------------------------------------------------------------------------------------------------------------------------------------------------------------------------------------------------------------------------------------------------------------------------------------------------------------------------------------------------------------------------------------------------------------------------------------------------------------------------------------------------------------------------------------------------------------------------------------------------------------------------------------------------------------------------------------------------------------------------------------------------------------------------------------------------------------------------------------------------------------------------------------------------------------------------------------------------------------------------------------------------------------------------------------------------------------------------------------------------------------------------------------------------------------------------------------------------------------------------------------------------------------------------------------------------------------------------------------------------------------------------------------------------------------------------------------------------------------------------------------------------------------------------------------------------------------------------------------------------------------------------------------------------------------------------------------------------------------------------------------------------------------------------------------------------------------------------------------------------------------------------------------------------------------------------------------------------------------------------------------------------------------------------------------------------------------------------------------------------------------------------------------------------------------------------------------------------------------------------------------------------------------------------------------------------------------------------------------------------------------------------------------------------------------------------------------------------------------------------------------------------------------------------------------------------------------------------------------------------------------------------------------------------------------------------------------------------------------------------------------------------------------------------------|
| Date          | February 06, 2023                                                                                                                                                                                                                                                                                                                                                                                                                                                                                                                                                                                                                                                                                                                                                                                                                                                                                                                                                                                                                                                                                                                                                                                                                                                                                                                                                                                                                                                                                                                                                                                                                                                                                                                                                                                                                                                                                                                                                                                                                                                                                                                                                                                                                                                                                                                                                                                                                                                                                                                                                                                                                                                                                                                                                                                                                                                                                                                                                                                                                                                                                                                                                                                                                                                                                                                                                                                                                                                                                                                                                                                                                                                                                                                                                                                                                                                                                                                                                                                                                                                                                                                                                                                                                                                                                         |
| Database      | PsycNET (PsycINFO)                                                                                                                                                                                                                                                                                                                                                                                                                                                                                                                                                                                                                                                                                                                                                                                                                                                                                                                                                                                                                                                                                                                                                                                                                                                                                                                                                                                                                                                                                                                                                                                                                                                                                                                                                                                                                                                                                                                                                                                                                                                                                                                                                                                                                                                                                                                                                                                                                                                                                                                                                                                                                                                                                                                                                                                                                                                                                                                                                                                                                                                                                                                                                                                                                                                                                                                                                                                                                                                                                                                                                                                                                                                                                                                                                                                                                                                                                                                                                                                                                                                                                                                                                                                                                                                                                        |
| Institution   | University of Guelph                                                                                                                                                                                                                                                                                                                                                                                                                                                                                                                                                                                                                                                                                                                                                                                                                                                                                                                                                                                                                                                                                                                                                                                                                                                                                                                                                                                                                                                                                                                                                                                                                                                                                                                                                                                                                                                                                                                                                                                                                                                                                                                                                                                                                                                                                                                                                                                                                                                                                                                                                                                                                                                                                                                                                                                                                                                                                                                                                                                                                                                                                                                                                                                                                                                                                                                                                                                                                                                                                                                                                                                                                                                                                                                                                                                                                                                                                                                                                                                                                                                                                                                                                                                                                                                                                      |
| Search string | ((( <b>Geographic Location:</b> (Canad*) <i>OR</i> <b>Geographic Location:</b> (Alberta) <i>OR</i> <b>Geographic Location:</b> ("British Columbia") <i>OR</i> <b>Geographic Location:</b> (Manitoba) <i>OR</i> <b>Geographic Location:</b> (Saskatchewan) <i>OR</i> <b>Geographic Location:</b> (Yukon) <i>OR</i> <b>Geographic Location:</b> ("Northwest Territories") <i>OR</i> <b>Geographic Location:</b> (Nunavut) <i>OR</i> <b>Geographic Location:</b> ("Nova Scotia") <i>OR</i> <b>Geographic Location:</b> ("New Brunswick") <i>OR</i> <b>Geographic Location:</b> (Newfoundland) <i>OR</i> <b>Geographic Location:</b> (Ontario) <i>OR</i> <b>Geographic Location:</b> (Quebec))) <i>AND</i> (( <b>Year:</b> [2013 TO 2023] <i>OR</i> <b>TestYear:</b> [2013 TO 2023]))) <i>AND</i> ((((( <b>Keywords:</b> (depressi*) <i>OR</i> ( <b>Keywords:</b> (anxiety)) <i>OR</i> ( <b>Keywords:</b> (stress)) <i>OR</i> ( <b>Keywords:</b> (suicid*) <i>OR</i> ( <b>Keywords:</b> (distress)) <i>OR</i> ( <b>Keywords:</b> (hopelessness)) <i>OR</i> ( <b>Keywords:</b> ("self-harm")) <i>OR</i> ( <b>Keywords:</b> ("self harm")) <i>OR</i> ( <b>Keywords:</b> ("self injury")) <i>OR</i> ( <b>Keywords:</b> ("self-injurious")) <i>OR</i> ( <b>Keywords:</b> (resilien*) <i>OR</i> ( <b>Keywords:</b> (panic*)) <i>OR</i> ( <b>Keywords:</b> (flourish*)) <i>OR</i> ( <b>Keywords:</b> (languish*)) <i>OR</i> ( <b>Keywords:</b> (hedoni*) <i>OR</i> ( <b>Keywords:</b> (eudaemoni*)) <i>OR</i> ( <b>Keywords:</b> (eudemoni*)) <i>OR</i> ( <b>Keywords:</b> (thriv*)) <i>OR</i> ( <b>Keywords:</b> (dyshtymi*)) <i>OR</i> ( <b>Keywords:</b> ("bipolar disorder")) <i>OR</i> ( <b>Keywords:</b> (cyclothymi*)) <i>OR</i> ( <b>Keywords:</b> (psychosis)) <i>OR</i> ( <b>Keywords:</b> (schizo*)) <i>OR</i> ( <b>Keywords:</b> (psychopath*)) <i>OR</i> ( <b>Keywords:</b> ("personality disorder")) <i>OR</i> ( <b>Keywords:</b> ("obsessive compulsive disorder")) <i>OR</i> ( <b>Keywords:</b> (OCD)) <i>OR</i> ( <b>Keywords:</b> ("eating disorder")) <i>OR</i> ( <b>Keywords:</b> (anorexi*)) <i>OR</i> ( <b>Keywords:</b> (bulimi*)) <i>OR</i> ( <b>Keywords:</b> (dysmorphi*)) <i>OR</i> ( <b>Keywords:</b> (PTSD))) <i>OR</i> ((( <b>Keywords:</b> (health)) <i>OR</i> ( <b>Keywords:</b> (well-being)) <i>OR</i> ( <b>Keywords:</b> ("well being")) <i>OR</i> ( <b>Keywords:</b> (wellbeing)) <i>OR</i> ( <b>Keywords:</b> (illness*)) <i>OR</i> ( <b>Keywords:</b> (disorder*)) <i>OR</i> ( <b>Keywords:</b> (problem*))))) <i>AND</i> (( <b>Keywords:</b> (mental)) <i>OR</i> ( <b>Keywords:</b> (emotional)) <i>OR</i> ( <b>Keywords:</b> (psych*)))) <i>OR</i> (( <b>title:</b> (depressi*)) <i>OR</i> ( <b>title:</b> (anxiety)) <i>OR</i> ( <b>title:</b> (stress)) <i>OR</i> ( <b>title:</b> (suicid*)) <i>OR</i> ( <b>title:</b> (distress)) <i>OR</i> ( <b>title:</b> (hopelessness)) <i>OR</i> ( <b>title:</b> ("self-harm")) <i>OR</i> ( <b>title:</b> ("self harm")) <i>OR</i> ( <b>title:</b> ("self injury")) <i>OR</i> ( <b>title:</b> ("self-injurious")) <i>OR</i> ( <b>title:</b> (resilien*)) <i>OR</i> ( <b>title:</b> (panic*)) <i>OR</i> ( <b>title:</b> (flourish*)) <i>OR</i> ( <b>title:</b> (languish*)) <i>OR</i> ( <b>title:</b> (hedoni*)) <i>OR</i> ( <b>title:</b> (eudaemoni*)) <i>OR</i> ( <b>title:</b> (eudemoni*)) <i>OR</i> ( <b>title:</b> (thriv*)) <i>OR</i> ( <b>title:</b> (dyshtymi*)) <i>OR</i> ( <b>title:</b> ("bipolar disorder")) <i>OR</i> ( <b>title:</b> (cyclothymi*)) <i>OR</i> ( <b>title:</b> (psychosis)) <i>OR</i> ( <b>title:</b> (schizo*)) <i>OR</i> ( <b>title:</b> (psychopath*)) <i>OR</i> ( <b>title:</b> ("personality disorder")) <i>OR</i> ( <b>title:</b> ("obsessive compulsive disorder")) <i>OR</i> ( <b>title:</b> (OCD)) <i>OR</i> ( <b>title:</b> ("eating disorder")) <i>OR</i> ( <b>title:</b> (anorexi*)) <i>OR</i> ( <b>title:</b> (bulimi*)) <i>OR</i> ( <b>title:</b> (dysmorphi*)) <i>OR</i> ( <b>title:</b> (PTSD))) <i>OR</i> ((( <b>title:</b> (health)) <i>OR</i> ( <b>title:</b> (well-being)) <i>OR</i> ( <b>title:</b> ("well being")) <i>OR</i> ( <b>title:</b> (wellbeing)) <i>OR</i> ( <b>title:</b> (illness*)) <i>OR</i> ( <b>title:</b> (disorder*)) <i>OR</i> ( <b>title:</b> (problem*))))) |

|        |                                                                                                                                                                                                                                                                                                                                                                                                                                                                                                                                                                                                                                                                                                                                                                                                                                                                                                                                                                                                                                                                                                                                                                                                                                                                                                                                                                                                                                                                                                                                                                                                                                                                                                                                                                                                                                                                                                                                                                                                                                                                                                                                                                                                                                                                                                             |
|--------|-------------------------------------------------------------------------------------------------------------------------------------------------------------------------------------------------------------------------------------------------------------------------------------------------------------------------------------------------------------------------------------------------------------------------------------------------------------------------------------------------------------------------------------------------------------------------------------------------------------------------------------------------------------------------------------------------------------------------------------------------------------------------------------------------------------------------------------------------------------------------------------------------------------------------------------------------------------------------------------------------------------------------------------------------------------------------------------------------------------------------------------------------------------------------------------------------------------------------------------------------------------------------------------------------------------------------------------------------------------------------------------------------------------------------------------------------------------------------------------------------------------------------------------------------------------------------------------------------------------------------------------------------------------------------------------------------------------------------------------------------------------------------------------------------------------------------------------------------------------------------------------------------------------------------------------------------------------------------------------------------------------------------------------------------------------------------------------------------------------------------------------------------------------------------------------------------------------------------------------------------------------------------------------------------------------|
|        | being)) OR (title: ("well being")) OR (title: (wellbeing)) OR (title: (illness*)) OR (title: (disorder*)) OR (title: (problem*)) AND ((title: (mental)) OR (title: (emotional)) OR (title: (psych*))) OR ((abstract: (depressi*)) OR (abstract: (anxiety)) OR (abstract: (stress)) OR (abstract: (suicid*)) OR (abstract: (distress)) OR (abstract: (hopelessness)) OR (abstract: ("self-harm")) OR (abstract: ("self harm")) OR (abstract: ("self injury")) OR (abstract: ("self-injurious")) OR (abstract: (resilien*)) OR (abstract: (panic*)) OR (abstract: (flourish*)) OR (abstract: (languish*)) OR (abstract: (hedoni*)) OR (abstract: (eudaemoni*)) OR (abstract: (eudemoni*)) OR (abstract: (thriv*)) OR (abstract: (dyshtymi*)) OR (abstract: ("bipolar disorder")) OR (abstract: (cyclothymi*)) OR (abstract: (psychosis)) OR (abstract: (schizo*)) OR (abstract: (psychopath*)) OR (abstract: ("personality disorder")) OR (abstract: ("obsessive compulsive disorder")) OR (abstract: (OCD)) OR (abstract: ("eating disorder")) OR (abstract: (anorexi*)) OR (abstract: (bulimi*)) OR (abstract: (dysmorphi*)) OR (abstract: (PTSD))) OR (((abstract: (health)) OR (abstract: (well-being)) OR (abstract: ("well being")) OR (abstract: (wellbeing)) OR (abstract: (illness*)) OR (abstract: (disorder*)) OR (abstract: (problem*))) AND ((abstract: (mental)) OR (abstract: (emotional)) OR (abstract: (psych*))) AND ((Year: [2013 TO 2023] OR TestYear: [2013 TO 2023]))) AND (((Keywords: (campus*)) OR (Keywords: (universit*)) OR (Keywords: (colleg*)) OR (Keywords: ("post-secondary")) OR (Keywords: ("post secondary")) OR (Keywords: (postsecondary)) OR (Keywords: ("higher education")) OR (Keywords: (undergrad*)) AND (Keywords: (student*)) OR ((abstract: (campus*)) OR (abstract: (universit*)) OR (abstract: (colleg*)) OR (abstract: ("post-secondary")) OR (abstract: ("post secondary")) OR (abstract: (postsecondary)) OR (abstract: ("higher education")) OR (abstract: (undergrad*))) AND (abstract: (student*)) OR ((title: (campus*)) OR (title: (universit*)) OR (title: (colleg*)) OR (title: ("post-secondary")) OR (title: ("post secondary")) OR (title: (postsecondary)) OR (title: ("higher education")) OR (title: (undergrad*))) AND (title: (student*))) |
| Hits   | 830                                                                                                                                                                                                                                                                                                                                                                                                                                                                                                                                                                                                                                                                                                                                                                                                                                                                                                                                                                                                                                                                                                                                                                                                                                                                                                                                                                                                                                                                                                                                                                                                                                                                                                                                                                                                                                                                                                                                                                                                                                                                                                                                                                                                                                                                                                         |
| Limits | TestYear: 2013 - 2023                                                                                                                                                                                                                                                                                                                                                                                                                                                                                                                                                                                                                                                                                                                                                                                                                                                                                                                                                                                                                                                                                                                                                                                                                                                                                                                                                                                                                                                                                                                                                                                                                                                                                                                                                                                                                                                                                                                                                                                                                                                                                                                                                                                                                                                                                       |

|               |                                                                                                                                                                                                                                                                                                                                                                                                                                                                                                                                                                                                                                                                                                                                                                                                                                                                                                                                                                                                                                                                                                                                                                                                                                                                                                                                                                                                                                                    |
|---------------|----------------------------------------------------------------------------------------------------------------------------------------------------------------------------------------------------------------------------------------------------------------------------------------------------------------------------------------------------------------------------------------------------------------------------------------------------------------------------------------------------------------------------------------------------------------------------------------------------------------------------------------------------------------------------------------------------------------------------------------------------------------------------------------------------------------------------------------------------------------------------------------------------------------------------------------------------------------------------------------------------------------------------------------------------------------------------------------------------------------------------------------------------------------------------------------------------------------------------------------------------------------------------------------------------------------------------------------------------------------------------------------------------------------------------------------------------|
| Date          | February 06, 2023                                                                                                                                                                                                                                                                                                                                                                                                                                                                                                                                                                                                                                                                                                                                                                                                                                                                                                                                                                                                                                                                                                                                                                                                                                                                                                                                                                                                                                  |
| Database      | EBSCOhost (Academic Search Premier, CINAHL, CINAHL Plus)                                                                                                                                                                                                                                                                                                                                                                                                                                                                                                                                                                                                                                                                                                                                                                                                                                                                                                                                                                                                                                                                                                                                                                                                                                                                                                                                                                                           |
| Institution   | University of Guelph                                                                                                                                                                                                                                                                                                                                                                                                                                                                                                                                                                                                                                                                                                                                                                                                                                                                                                                                                                                                                                                                                                                                                                                                                                                                                                                                                                                                                               |
| Search string | (AB ((mental AND health) OR wellbeing OR well-being OR (well AND being) OR flourishing OR languishing)) AND AB student* AND AB campus* OR universit* OR colleg* OR "post-secondary" OR (post secondary) AND AB (mental AND illness*) OR (mental AND disorder*) OR (psych* AND problem*) OR (psych* AND illness) OR (psych* AND Disorder*) OR depression OR anxiety OR stress OR distress OR (self-harm) OR "self harm" OR "Self injury" OR "self-injurious" OR suicid*)) OR [TI ((mental AND health) OR wellbeing OR well-being OR (well AND being) OR flourishing OR languishing)) AND TI student* AND TI ( campus* OR universit* OR colleg* OR "post-secondary" OR (post secondary) ) AND TI ( (mental AND illness*) OR (mental AND disorder*) OR (psych* AND problem*) OR (psych* AND illness) OR (psych* AND Disorder*) OR depression OR anxiety OR stress OR distress OR (self-harm) OR "self harm" OR "Self injury" OR "self-injurious" OR suicid* ) ] OR [SU ( ((mental AND health) OR wellbeing OR well-being OR (well AND being) OR flourishing OR languishing)) AND SU student* AND SU ( campus* OR universit* OR colleg* OR "post-secondary" OR (post secondary) ) AND SU ( (mental AND illness*) OR (mental AND disorder*) OR (psych* AND problem*) OR (psych* AND illness) OR (psych* AND Disorder*) OR depression OR anxiety OR stress OR distress OR (self-harm) OR "self harm" OR "Self injury" OR "self-injurious" OR suicid* ) ] |
| Hits          | 581                                                                                                                                                                                                                                                                                                                                                                                                                                                                                                                                                                                                                                                                                                                                                                                                                                                                                                                                                                                                                                                                                                                                                                                                                                                                                                                                                                                                                                                |
| Limits        | SubjectGeographic: Canada<br>Published Date: 2013 - 2023                                                                                                                                                                                                                                                                                                                                                                                                                                                                                                                                                                                                                                                                                                                                                                                                                                                                                                                                                                                                                                                                                                                                                                                                                                                                                                                                                                                           |

|      |                   |
|------|-------------------|
| Date | February 06, 2023 |
|------|-------------------|

|               |                                                                                                                                                                                                                                                                                                                                                                                                                                                                                                                                                                                                                                                                                                                                                                                                                                                                                                                                                                                                                                                                                                                                                                                                                                                                                                                                                                                                                                                                                                                                                                                                                                                                                                                                                                                                                                                      |
|---------------|------------------------------------------------------------------------------------------------------------------------------------------------------------------------------------------------------------------------------------------------------------------------------------------------------------------------------------------------------------------------------------------------------------------------------------------------------------------------------------------------------------------------------------------------------------------------------------------------------------------------------------------------------------------------------------------------------------------------------------------------------------------------------------------------------------------------------------------------------------------------------------------------------------------------------------------------------------------------------------------------------------------------------------------------------------------------------------------------------------------------------------------------------------------------------------------------------------------------------------------------------------------------------------------------------------------------------------------------------------------------------------------------------------------------------------------------------------------------------------------------------------------------------------------------------------------------------------------------------------------------------------------------------------------------------------------------------------------------------------------------------------------------------------------------------------------------------------------------------|
| Database      | PubMed                                                                                                                                                                                                                                                                                                                                                                                                                                                                                                                                                                                                                                                                                                                                                                                                                                                                                                                                                                                                                                                                                                                                                                                                                                                                                                                                                                                                                                                                                                                                                                                                                                                                                                                                                                                                                                               |
| Institution   | University of Guelph                                                                                                                                                                                                                                                                                                                                                                                                                                                                                                                                                                                                                                                                                                                                                                                                                                                                                                                                                                                                                                                                                                                                                                                                                                                                                                                                                                                                                                                                                                                                                                                                                                                                                                                                                                                                                                 |
| Search string | ((("Canada"[Mesh] OR "Canada"[TIAB] OR "Canada"[OT])) AND ((y_10[Filter]) AND (humans[Filter]) AND (english[Filter] OR french[Filter]))) AND (((campus*[Title/Abstract] OR universit*[Title/Abstract] OR colleg*[Title/Abstract] OR "post-secondary"[Title/Abstract] OR "post secondary"[Title/Abstract] OR postsecondary[Title/Abstract] OR "higher education"[Title/Abstract] OR undergrad*[Title/Abstract]) AND student*[Title/Abstract]) AND (((health[Title/Abstract] OR well-being[Title/Abstract] OR "well being"[Title/Abstract] OR wellbeing[Title/Abstract] OR illness*[Title/Abstract] OR disorder*[Title/Abstract] OR problem*[Title/Abstract]) AND (mental[Title/Abstract] OR emotional[Title/Abstract] OR psych*[Title/Abstract])) OR (depressi*[Title/Abstract] OR anxiety[Title/Abstract] OR stress[Title/Abstract] OR suicid*[Title/Abstract] OR distress[Title/Abstract] OR hopelessness[Title/Abstract] OR "self-harm"[Title/Abstract] OR "self harm"[Title/Abstract] OR "self injury"[Title/Abstract] OR "self-injurious"[Title/Abstract] OR resilien*[Title/Abstract] OR panic*[Title/Abstract] OR flourish*[Title/Abstract] OR languish*[Title/Abstract] OR hedoni*[Title/Abstract] OR eudaemoni*[Title/Abstract] OR eudemoni*[Title/Abstract] OR thrive*[Title/Abstract] OR dyshtymi*[Title/Abstract] OR "bipolar disorder"[Title/Abstract] OR cyclothymi*[Title/Abstract] OR psychosis[Title/Abstract] OR schizo*[Title/Abstract] OR psychopath*[Title/Abstract] OR "personality disorder"[Title/Abstract] OR "obsessive compulsive disorder"[Title/Abstract] OR OCD[Title/Abstract] OR "eating disorder"[Title/Abstract] OR anorexi*[Title/Abstract] OR bulimi*[Title/Abstract] OR dysmorphi*[Title/Abstract] OR PTSD[Title/Abstract]))) AND ((y_10[Filter]) AND (humans[Filter]) AND (english[Filter] OR french[Filter]))) |
| Hits          | 274                                                                                                                                                                                                                                                                                                                                                                                                                                                                                                                                                                                                                                                                                                                                                                                                                                                                                                                                                                                                                                                                                                                                                                                                                                                                                                                                                                                                                                                                                                                                                                                                                                                                                                                                                                                                                                                  |
| Limits        | Publication Date: 10 years<br>Species: Humans<br>Article Language: English or French                                                                                                                                                                                                                                                                                                                                                                                                                                                                                                                                                                                                                                                                                                                                                                                                                                                                                                                                                                                                                                                                                                                                                                                                                                                                                                                                                                                                                                                                                                                                                                                                                                                                                                                                                                 |

|               |                                                                                                                                                                                                                                                                                                                                                                                                                                                                                                                                                                                                                                                                                                                                                                                                                                                                                                                                                                                                                                                                                                                                                                                                                                                                                                                                                                                                                                                                                                                                                                       |
|---------------|-----------------------------------------------------------------------------------------------------------------------------------------------------------------------------------------------------------------------------------------------------------------------------------------------------------------------------------------------------------------------------------------------------------------------------------------------------------------------------------------------------------------------------------------------------------------------------------------------------------------------------------------------------------------------------------------------------------------------------------------------------------------------------------------------------------------------------------------------------------------------------------------------------------------------------------------------------------------------------------------------------------------------------------------------------------------------------------------------------------------------------------------------------------------------------------------------------------------------------------------------------------------------------------------------------------------------------------------------------------------------------------------------------------------------------------------------------------------------------------------------------------------------------------------------------------------------|
| Date          | February 06, 2023                                                                                                                                                                                                                                                                                                                                                                                                                                                                                                                                                                                                                                                                                                                                                                                                                                                                                                                                                                                                                                                                                                                                                                                                                                                                                                                                                                                                                                                                                                                                                     |
| Database      | ProQuest Dissertations and Theses                                                                                                                                                                                                                                                                                                                                                                                                                                                                                                                                                                                                                                                                                                                                                                                                                                                                                                                                                                                                                                                                                                                                                                                                                                                                                                                                                                                                                                                                                                                                     |
| Institution   | University of Guelph                                                                                                                                                                                                                                                                                                                                                                                                                                                                                                                                                                                                                                                                                                                                                                                                                                                                                                                                                                                                                                                                                                                                                                                                                                                                                                                                                                                                                                                                                                                                                  |
| Search string | title((depressi* OR anxiety OR stress OR suicid* OR distress OR hopelessness OR "self-harm" OR "self harm" OR "self injury" OR "self-injurious" OR resilien* OR panic* OR flourish* OR languish* OR hedoni* OR eudaemoni* OR eudemoni* OR thrive* OR dyshtymi* OR "bipolar disorder" OR cyclothymi* OR psychosis OR schizo* OR psychopath* OR "personality disorder" OR "obsessive compulsive disorder" OR OCD OR "eating disorder" OR anorexi* OR bulimi* OR dysmorphi* OR PTSD) OR ((health OR well-being OR "well being" OR wellbeing OR illness* OR disorder* OR problem*) AND (mental OR emotional OR psych*))) AND fulltext(student* AND (campus* OR universit* OR colleg* OR "post-secondary" OR "post secondary" OR postsecondary OR "higher education" OR undergrad*)) OR abstract((depressi* OR anxiety OR stress OR suicid* OR distress OR hopelessness OR "self-harm" OR "self harm" OR "self injury" OR "self-injurious" OR resilien* OR panic* OR flourish* OR languish* OR hedoni* OR eudaemoni* OR eudemoni* OR thrive* OR dyshtymi* OR "bipolar disorder" OR cyclothymi* OR psychosis OR schizo* OR psychopath* OR "personality disorder" OR "obsessive compulsive disorder" OR OCD OR "eating disorder" OR anorexi* OR bulimi* OR dysmorphi* OR PTSD) OR ((health OR well-being OR "well being" OR wellbeing OR illness* OR disorder* OR problem*) AND (mental OR emotional OR psych*))) AND abstract(student* AND (campus* OR universit* OR colleg* OR "post-secondary" OR "post secondary" OR postsecondary OR "higher education" OR undergrad*)) |
| Hits          | 116                                                                                                                                                                                                                                                                                                                                                                                                                                                                                                                                                                                                                                                                                                                                                                                                                                                                                                                                                                                                                                                                                                                                                                                                                                                                                                                                                                                                                                                                                                                                                                   |
| Limits        | Location: Canada                                                                                                                                                                                                                                                                                                                                                                                                                                                                                                                                                                                                                                                                                                                                                                                                                                                                                                                                                                                                                                                                                                                                                                                                                                                                                                                                                                                                                                                                                                                                                      |
