# Supplementary material
Source: MDPI journal article supplement (https://www.mdpi.com/2624-8611/5/3/40)
Supplement: s1 [file s1]

Archive with 4 entries (4 files):
- S1 File - Reporting checklist.pdf
- S2 File - Review protocol.pdf
- S3 File - Search documentation.pdf
- S4 File - Study characteristics table.pdf
